# Supplementary material for: Protocol for a prospective interventional trial to develop a diagnostic index test for stroke as a cause of vertigo, dizziness and imbalance in the emergency room (EMVERT study)
Source: PubMed Central journal article supplement — BMJ Open. 2017 Oct 10;7(10):e019073. doi: 10.1136/bmjopen-2017-019073 (PMC5652468; doi:10.1136/bmjopen-2017-019073), 2017-10-10
Supplement: bmjopen-2017-019073.reviewer_comments.pdf [file bmjopen-2017-019073.reviewer_comments.pdf]

## PEER REVIEW HISTORY

BMJ Open publishes all reviews undertaken for accepted manuscripts. Reviewers are asked to complete a checklist review form (<http://bmjopen.bmj.com/site/about/resources/checklist.pdf>) and are provided with free text boxes to elaborate on their assessment. These free text comments are reproduced below.

## ARTICLE DETAILS

|                            |                                                                                                                                                                                   |
|----------------------------|-----------------------------------------------------------------------------------------------------------------------------------------------------------------------------------|
| <b>TITLE (PROVISIONAL)</b> | Protocol for a prospective interventional trial to develop a diagnostic index test for stroke as a cause of vertigo, dizziness and imbalance in the emergency room (EMVERT study) |
| <b>AUTHORS</b>             | Möhwald, Ken; Bardins, Stanislavs; Müller, Hans-Helge; Jahn, Klaus; Zwergal, Andreas                                                                                              |

This article was not externally reviewed at BMJ Open. Protocols that have been independently assessed prior to submission to BMJ Open are usually fast-tracked to publication on the grounds that further substantial changes will not be possible. This independent assessment will usually be external, independent review for both a substantial grant award from a non-commercial or government funder and ethics approval.
